# Supplementary material for: Tumour necrosis factor blockade after asphyxia in foetal sheep ameliorates cystic white matter injury
Source: PubMed Central journal article supplement — Brain. 2022 Sep 10;146(4):1453–66. doi: 10.1093/brain/awac331 (PMC10115165; doi:10.1093/brain/awac331), 2022-09-10
Supplement: awac331_supplementary_data.pdf [file awac331_supplementary_data.pdf]

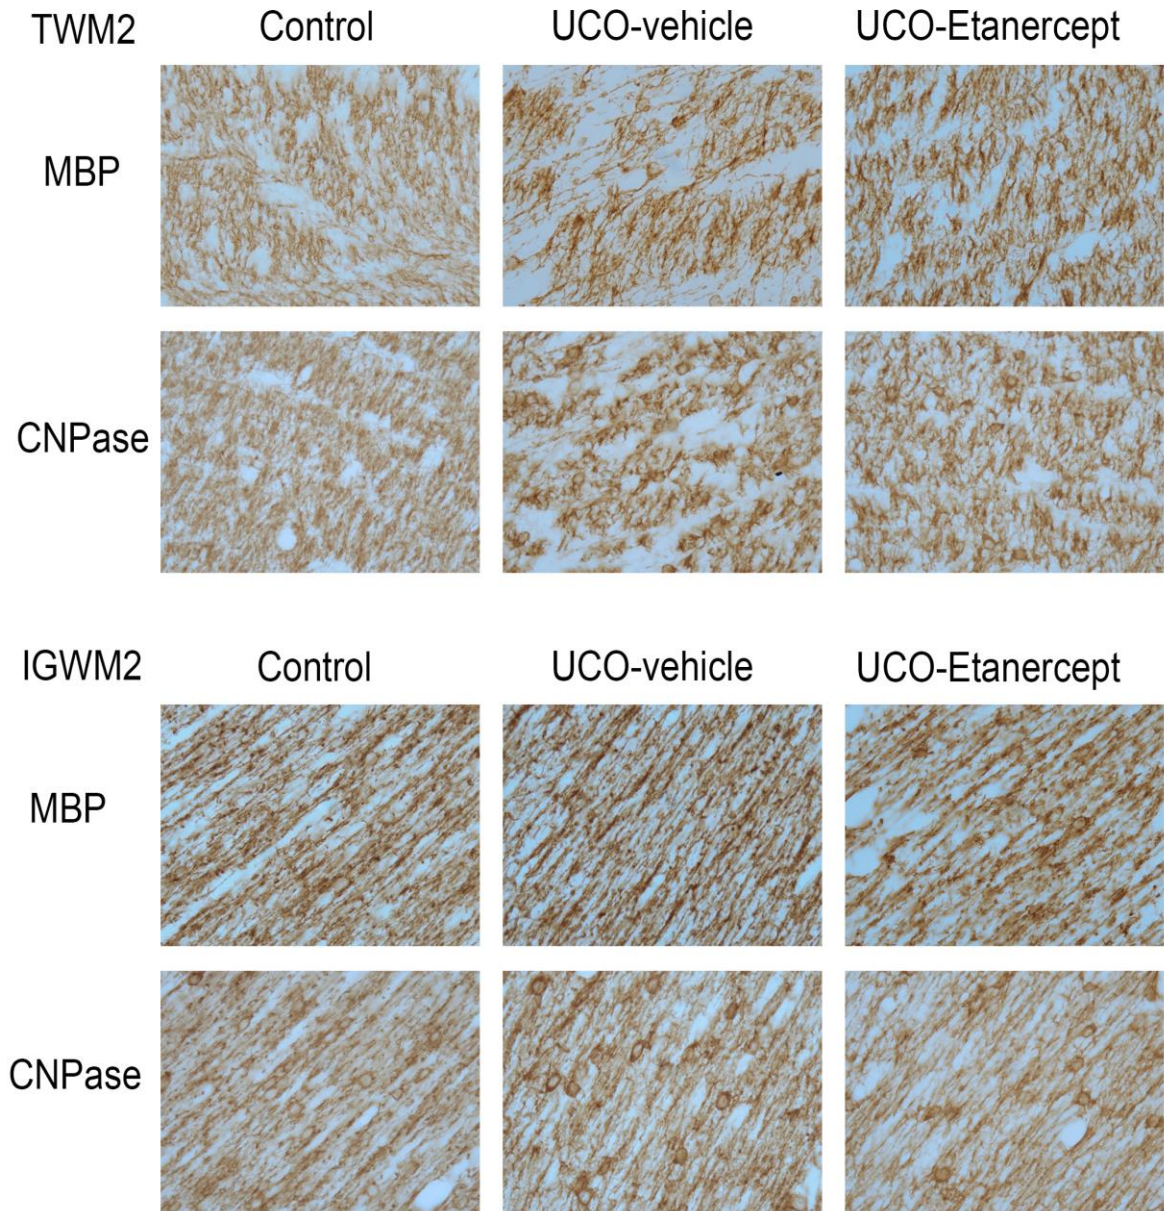

Figure S1: Photomicrographs at 40x magnification of CNPase-positive and MBP-positive labelling in the TWM2 (**Top**) and IGWM2 (**Bottom**) regions. Scale bar = 100  $\mu$ m.
